# Supplementary material
Source: publisher figshare collection journal article supplement (https://acs.figshare.com/ndownloader/files/25151125)
Supplement: Supplementary file 1 [file 25151125]

## Supporting Information

### Computationally predicted high throughput free energy phase diagrams for the discovery of solid-state hydrogen storage reactions

Jacob M. Clary,<sup>1</sup> Aaron M. Holder,<sup>1,2,3</sup> Charles B. Musgrave<sup>\*,1,2,4,5,6</sup>

<sup>1</sup>Department of Chemical and Biological Engineering, University of Colorado Boulder, Boulder, CO 80309, USA

<sup>2</sup>Materials and Chemical Science and Technology Center, National Renewable Energy Laboratory, Golden, CO 80401, USA

<sup>3</sup>Renewable and Sustainable Energy Institute, University of Colorado Boulder, Boulder, CO 80309, USA

<sup>4</sup>Department of Chemistry, University of Colorado Boulder, Boulder, CO 80309, USA

<sup>5</sup>Renewable and Sustainable Energy Institute, University of Colorado Boulder, Boulder, CO 80309, USA

<sup>6</sup>Materials Science and Engineering Program, University of Colorado Boulder, Boulder, CO 80309, USA

\*Correspondence and should be addressed to [charles.musgrave@colorado.edu](mailto:charles.musgrave@colorado.edu)

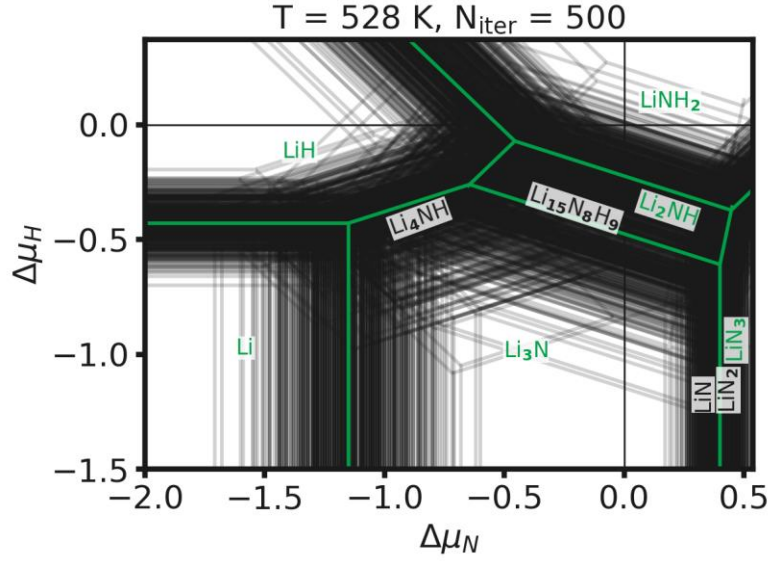

**Figure S1. Li-N-H chemical potential phase diagram boundaries at 528 K after applied normally distributed shifts to all  $\Delta H_f$  and  $G^\delta(T)$  for 500 iterations.** The phase boundaries and associated phases without any applied noise are overlaid in green. The phase boundaries and additional phases that can form due to the introduction of noise are shown in black. The random noise applied here represents the worst case if the errors between compounds in the same compositional space are not correlated and thus shows that the qualitative trends predicted here are likely accurate. Regions of stability for the Li, LiH, Li<sub>3</sub>N, and LiNH<sub>2</sub> phases were always present. Regions of stability for the LiN<sub>3</sub>, Li<sub>2</sub>NH, LiN<sub>2</sub>, Li<sub>4</sub>NH, Li<sub>15</sub>N<sub>8</sub>H<sub>9</sub>, and LiN phases were present in 81.0%, 74.6%, 33.0%, 32.0%, 21.6%, and 0.2% of iterations. We note that the Li<sub>15</sub>N<sub>8</sub>H<sub>9</sub> phase is a mixed Li<sub>2</sub>NH/LiNH<sub>2</sub> phase with a crystal structure most similar to the Li<sub>2</sub>NH phase. Because the Li<sub>2</sub>NH/LiNH<sub>2</sub> mixed phases in this compositional space can be written as Li<sub>2x+y</sub>(NH)<sub>x</sub>(NH<sub>2</sub>)<sub>y</sub>, the Li<sub>15</sub>N<sub>8</sub>H<sub>9</sub> phase is more accurately represented as Li<sub>15</sub>(NH)<sub>7</sub>(NH<sub>2</sub>) (x = 7 and y = 1). Because the errors associated with describing this phase are expected to be highly correlated with the error in Li<sub>2</sub>NH due to their crystal structure similarity, the shifts applied to this phase were calculated via a linear weighting, determined by x and y, of the shifts applied to Li<sub>2</sub>NH and LiNH<sub>2</sub>. Thus, a Li<sub>2</sub>NH-like phase was present in 96.2% of iterations.

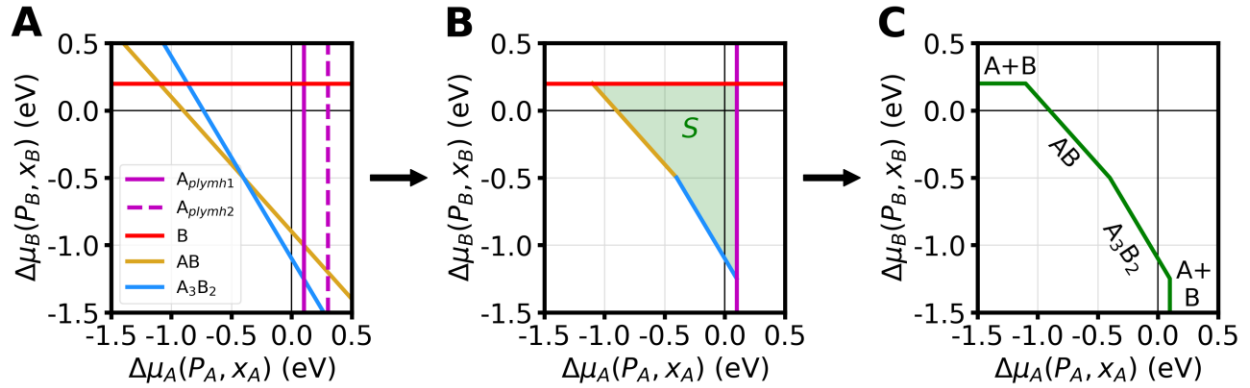

**Figure S2. Example schematic for constructing chemical potential phase diagram for binary A-B compositional space.** This compositional space contains two polymorphs of element A, element B, and the compounds AB and A<sub>3</sub>B<sub>2</sub>. **A)** Lines defined by Eq. 2 and 3 for all species. **B)** Largest shape S bounded by the lowest energy polymorphs of all Eq. 2 and 3. **C)** Regions over  $\Delta\mu_A(P_A, x_A)$  where each species is stable. Note that for two polymorphs of compound AB, which we call AB<sub>p1</sub> and AB<sub>p2</sub>, the polymorph with more negative  $\Delta G_f$  will be the thermodynamically favored compound. Mathematically, this is equivalent to writing:  $\Delta G_{f,AB_{p1}} = \Delta\mu_A(P_A, x_A) + \Delta\mu_B(P_B, x_B)$  and  $\Delta G_{f,AB_{p2}} = \Delta\mu_A(P_A, x_A) + \Delta\mu_B(P_B, x_B)$ . Rearranging both equations for

$\Delta\mu_A(P_A, x_A)$  and solving for the compound with minimum  $\Delta\mu_B(P_B, x_B)$  at all independent  $\Delta\mu_A(P_A, x_A)$  results in predicting the most stable polymorph of AB and the one with most negative  $\Delta G_f$ . This process can be repeated for any number of phases within the compositional space.

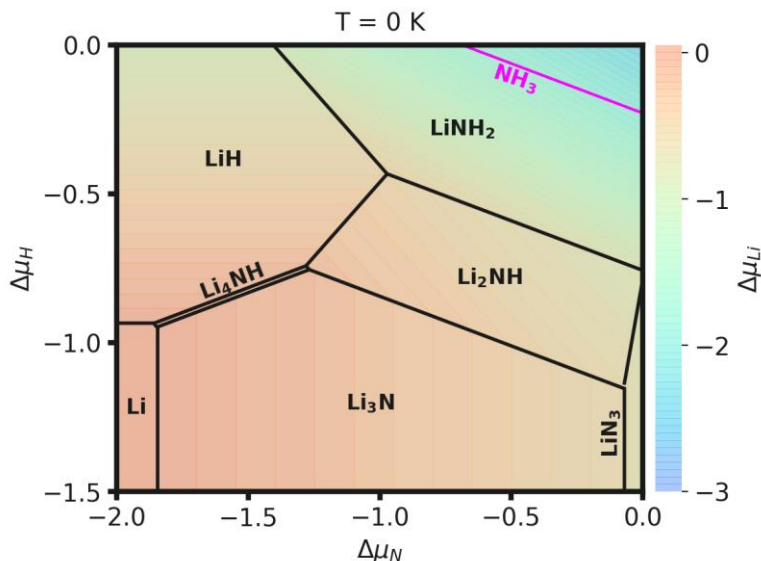

**Figure S3. Li-N-H ternary chemical potential phase diagram.** At  $T = 0$  K. The regions labeled by compositions are regions of stability for compounds with those compositions. The sets of  $\Delta\mu_i$  that fall above the magenta line correspond to conditions where  $\text{NH}_3$  is predicted to be stable.

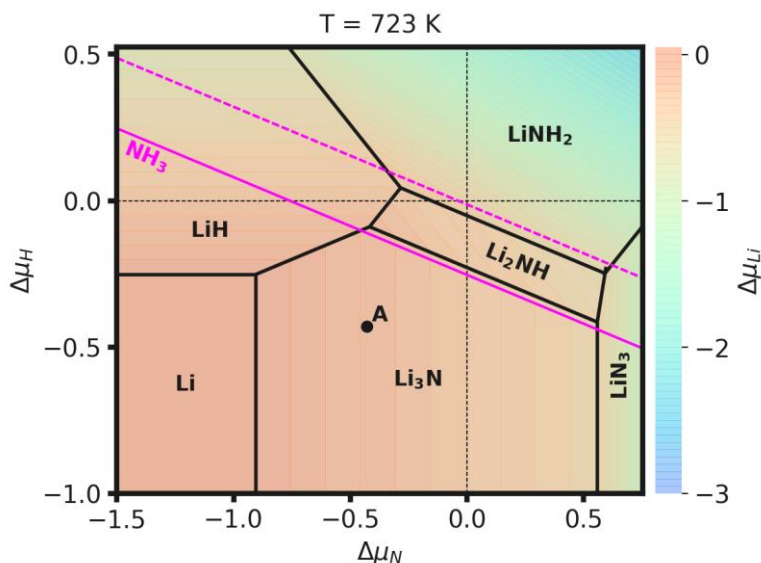

**Figure S4. Li-N-H ternary chemical potential phase diagram.** At  $T = 723$  K. The regions labeled by compositions are regions of stability for compounds with those compositions. The sets of  $\Delta\mu_i$  that fall above the magenta lines correspond to conditions where  $\text{NH}_3$  is predicted to be stable for  $P_{\text{NH}_3} = 10^{-6}$  bar (solid) and  $P_{\text{NH}_3} = 0.1$  bar (dashed). The black point labeled A corresponds to conditions of vacuum  $P_{\text{N}_2}$  and  $P_{\text{H}_2}$  ( $\Delta\mu_N = \Delta\mu_H = -0.43$  eV).

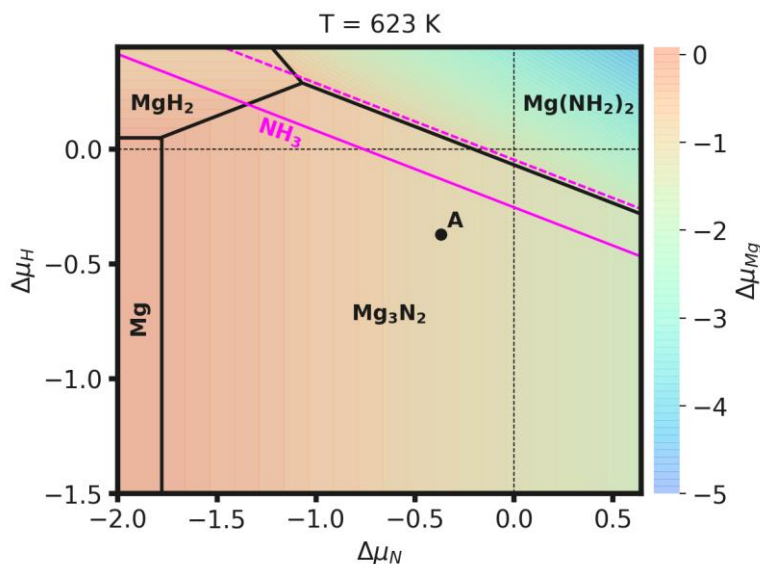

**Figure S5. Mg-N-H ternary chemical potential phase diagram.** At  $T = 623 \text{ K}$ . The regions labeled by compositions are regions of stability for compounds with those compositions. The sets of  $\Delta\mu_i$  that fall above the magenta lines correspond to conditions where  $\text{NH}_3$  is predicted to be stable for  $P_{\text{NH}_3} = 10^{-6} \text{ bar}$  (solid) and  $P_{\text{NH}_3} = 0.1 \text{ bar}$  (dashed). The black point labeled A corresponds to conditions of vacuum  $P_{\text{N}_2}$  and  $P_{\text{H}_2}$  ( $\Delta\mu_N = \Delta\mu_H = -0.37 \text{ eV}$ ).

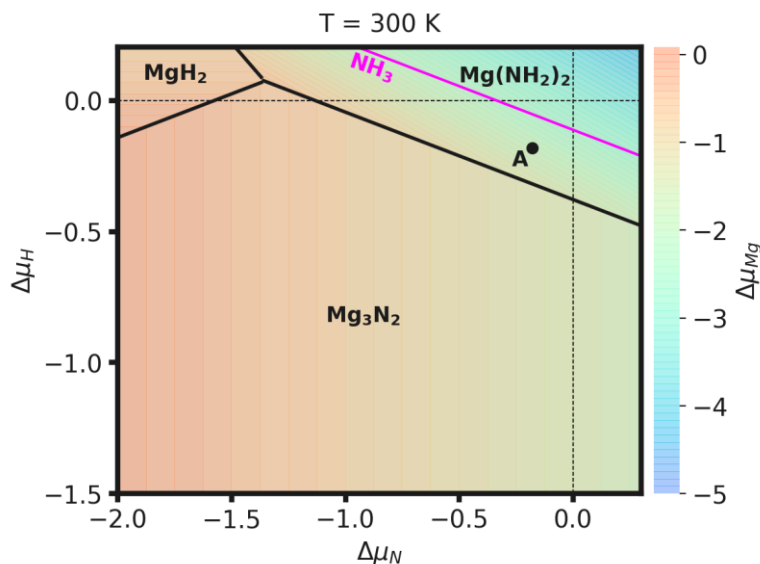

**Figure S6. Mg-N-H ternary chemical potential phase diagram.** At  $T = 300 \text{ K}$ . The regions labeled by compositions are regions of stability for compounds with those compositions. The sets of  $\Delta\mu_i$  that fall above the magenta line correspond to conditions where  $\text{NH}_3$  is predicted to be stable for  $P_{\text{NH}_3} = 5 \text{ bar}$ . The black point labeled A corresponds to conditions of vacuum  $P_{\text{N}_2}$  and  $P_{\text{H}_2}$  ( $\Delta\mu_N = \Delta\mu_H = -0.18 \text{ eV}$ ).

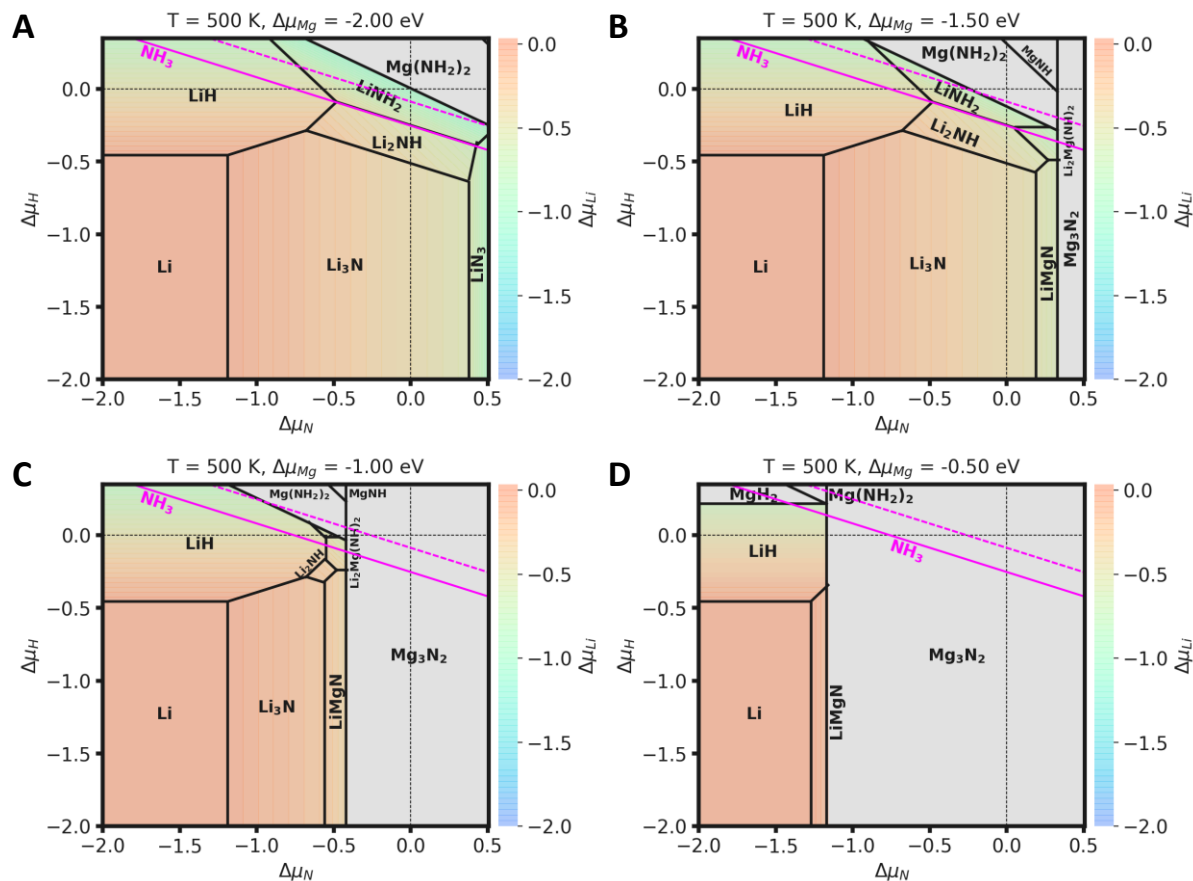

**Figure S7. Li-Mg-N-H quaternary chemical potential phase diagram.** At  $T = 500$  K. **A)**  $\Delta\mu_{Mg} = -2.00$  eV, **B)**  $\Delta\mu_{Mg} = -1.50$  eV, **C)**  $\Delta\mu_{Mg} = -1.00$  eV, and **D)**  $\Delta\mu_{Mg} = -0.50$  eV. The regions labeled by compositions are regions of stability for compounds with those compositions. The sets of  $\Delta\mu_i$  that fall above the magenta lines correspond to conditions where  $\text{NH}_3$  is predicted to be stable for  $P_{\text{NH}_3} = 10^{-6}$  bar (solid) and  $P_{\text{NH}_3} = 0.1$  bar (dashed).

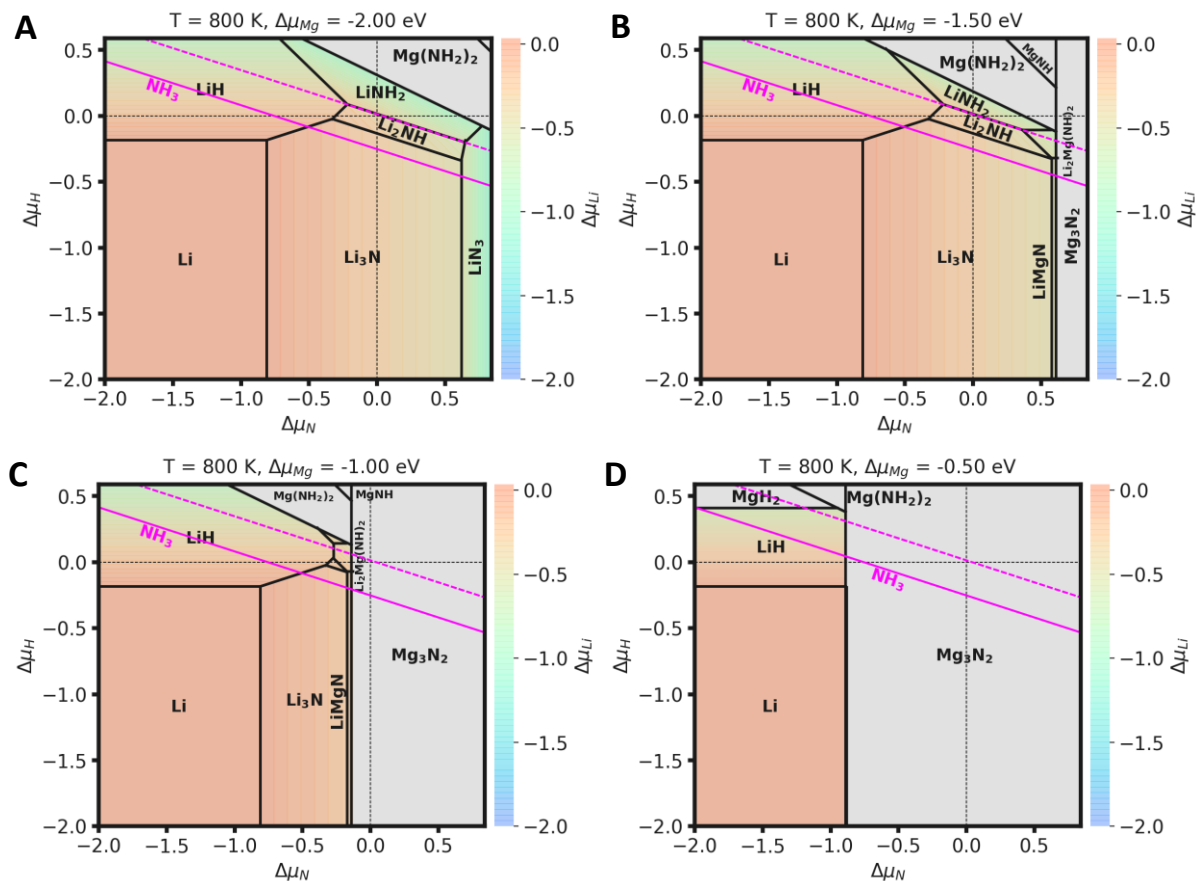

**Figure S8. Li-Mg-N-H quaternary chemical potential phase diagram.** At  $T = 800$  K. **A)**  $\Delta\mu_{Mg} = -2.00$  eV, **B)**  $\Delta\mu_{Mg} = -1.50$  eV, **C)**  $\Delta\mu_{Mg} = -1.00$  eV, and **D)**  $\Delta\mu_{Mg} = -0.50$  eV. The regions labeled by compositions are regions of stability for compounds with those compositions. The sets of  $\Delta\mu_i$  that fall above the magenta lines correspond to conditions where  $\text{NH}_3$  is predicted to be stable for  $P_{\text{NH}_3} = 10^{-6}$  bar (solid) and  $P_{\text{NH}_3} = 0.1$  bar (dashed).

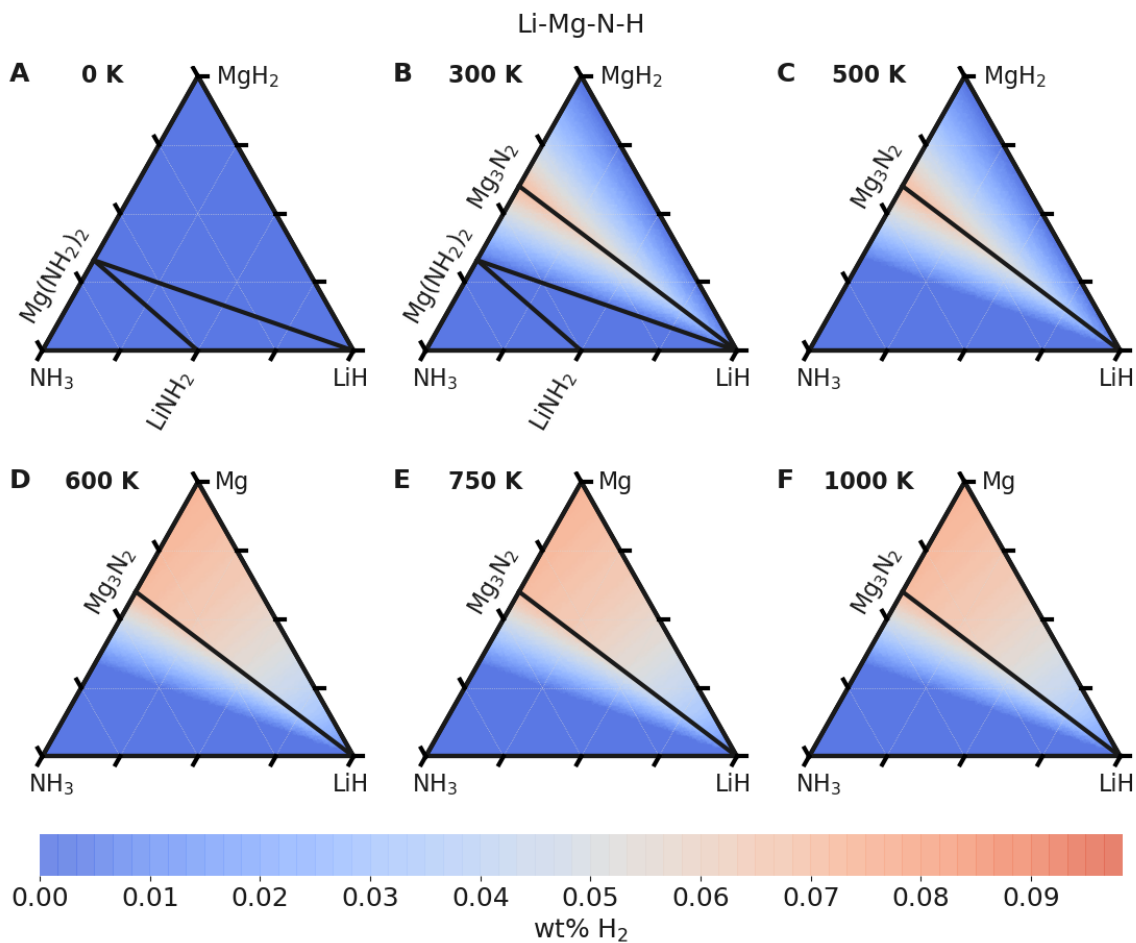

**Figure S9.** Composition phase diagrams of Li-Mg-N-H system at different temperatures at  $P_{\text{NH}_3} = 10^{-6} \text{ bar}$ . A) 0 K, B) 300 K, C) 500 K, D) 600 K, E) 750 K, F) 1000 K. The color axis is the weight fraction of released H<sub>2</sub> relative to the mixture at 0 K.

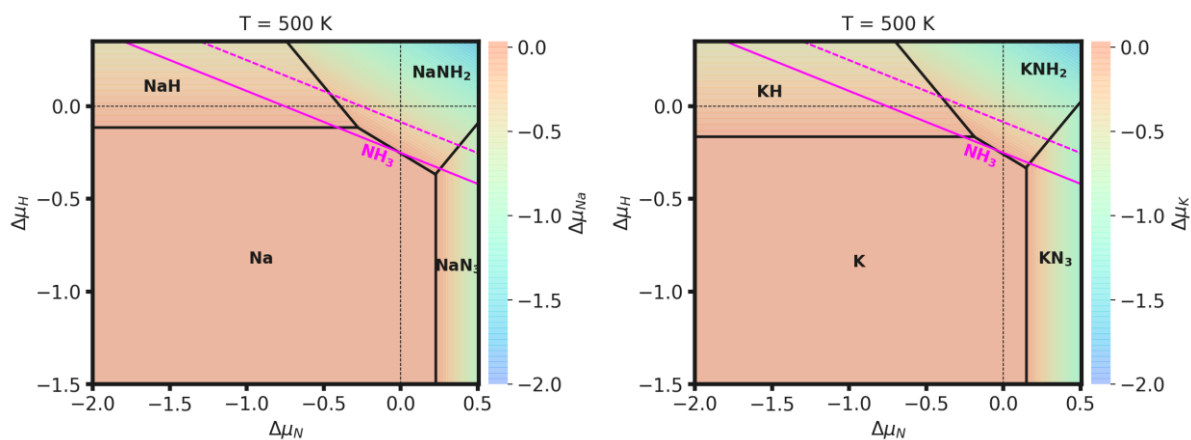

**Figure S10.** Alk-N-H ternary chemical potential phase diagrams. At  $T = 500 \text{ K}$ . The regions labeled by compositions are regions of stability for compounds with those compositions. The sets of  $\Delta\mu_i$  that fall above the magenta lines correspond to conditions where NH<sub>3</sub> is predicted to be stable for  $P_{\text{NH}_3} = 10^{-6} \text{ bar}$  (solid) and  $P_{\text{NH}_3} = 0.1 \text{ bar}$  (dashed).

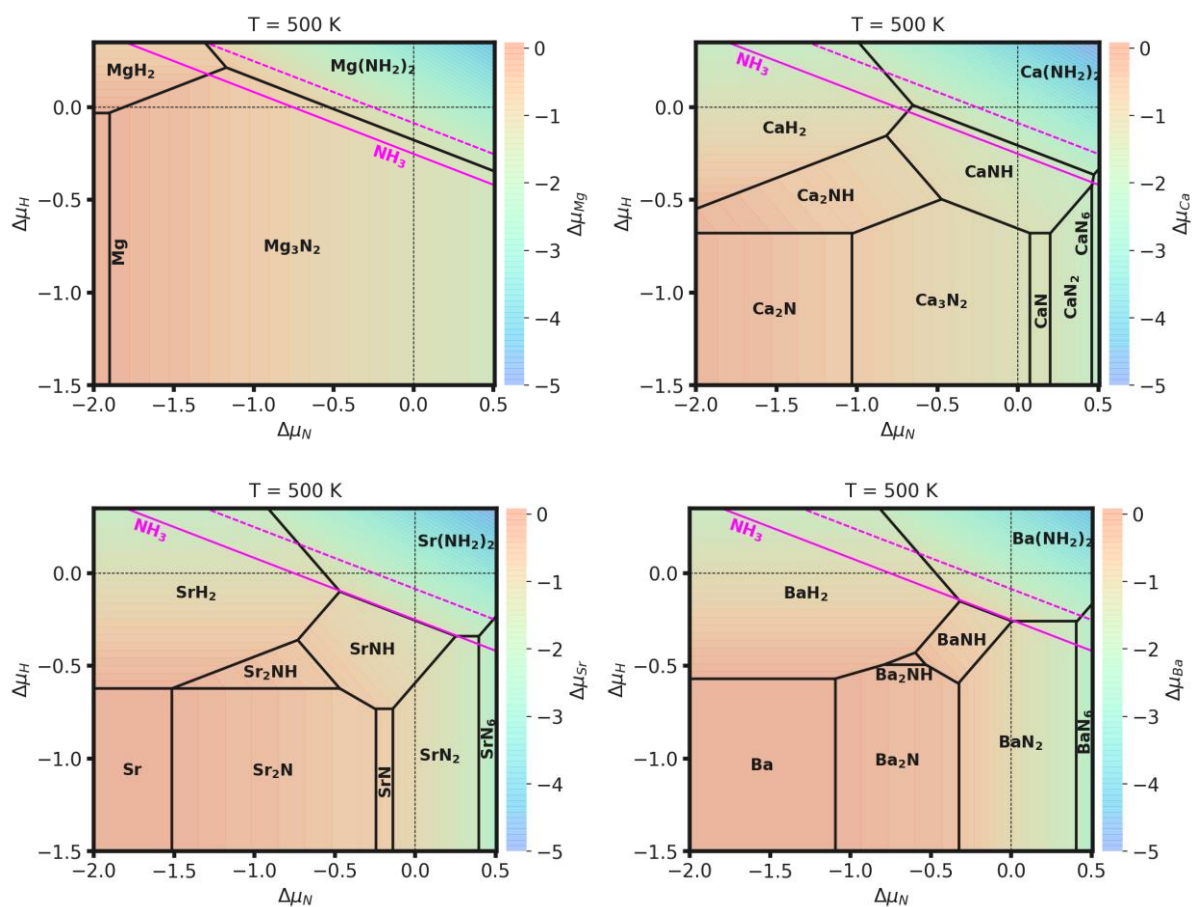

**Figure S11. AE-N-H chemical potential ternary phase diagrams.** At  $T = 500$  K. The regions labeled by compositions are regions of stability for compounds with those compositions. The sets of  $\Delta\mu_i$  that fall above the magenta lines correspond to conditions where  $\text{NH}_3$  is predicted to be stable for  $P_{\text{NH}_3} = 10^{-6}$  bar (solid) and  $P_{\text{NH}_3} = 0.1$  bar (dashed).

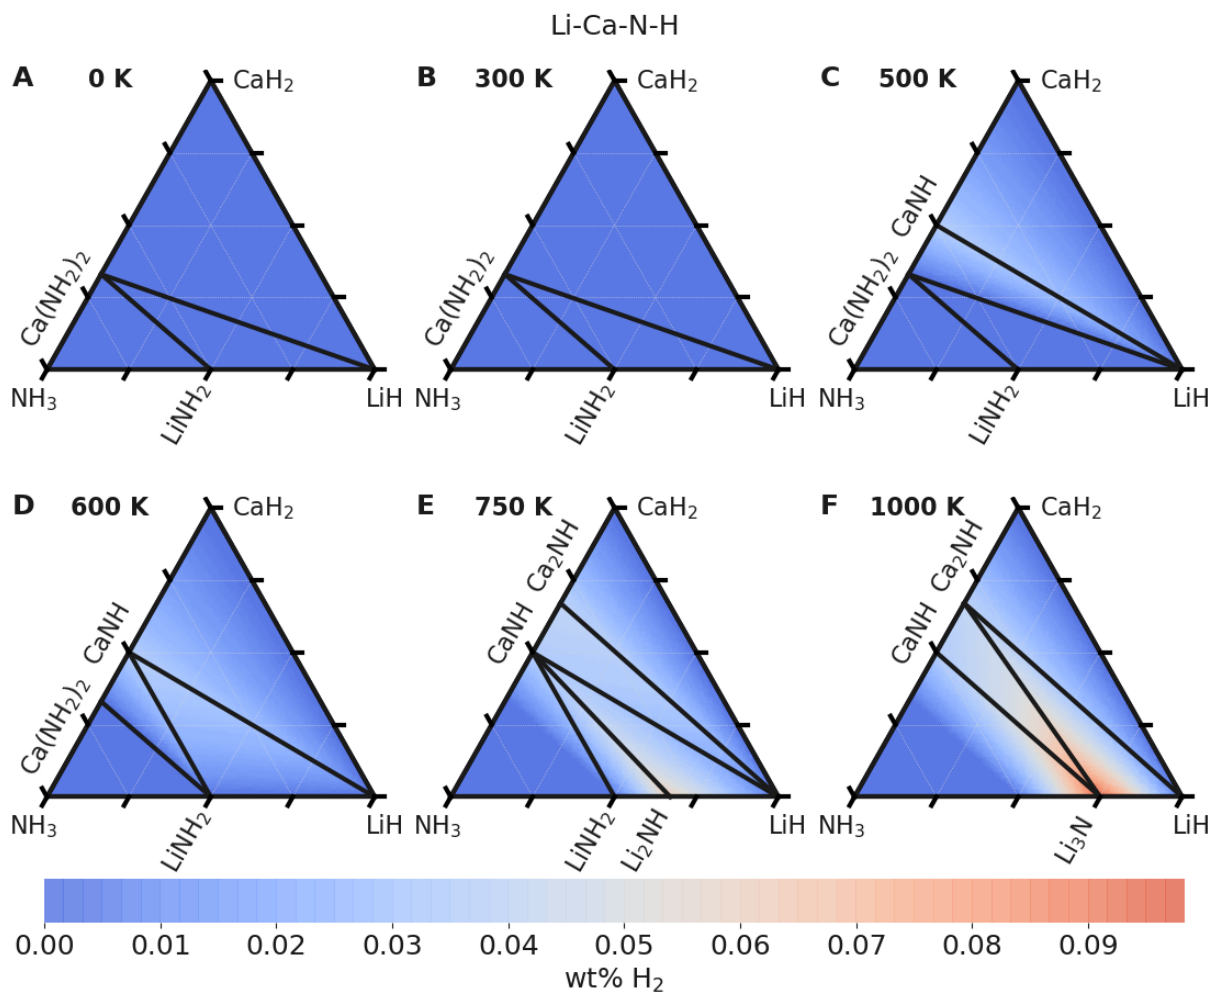

**Figure S12.** Composition phase diagrams of Li-Ca-N-H system at different temperatures at  $P_{\text{NH}_3} = 0.1 \text{ bar}$ . A) 0 K, B) 300 K, C) 500 K, D) 600 K, E) 750 K, F) 1000 K. The color axis is the weight fraction of released H<sub>2</sub> relative to the mixture at 0 K.

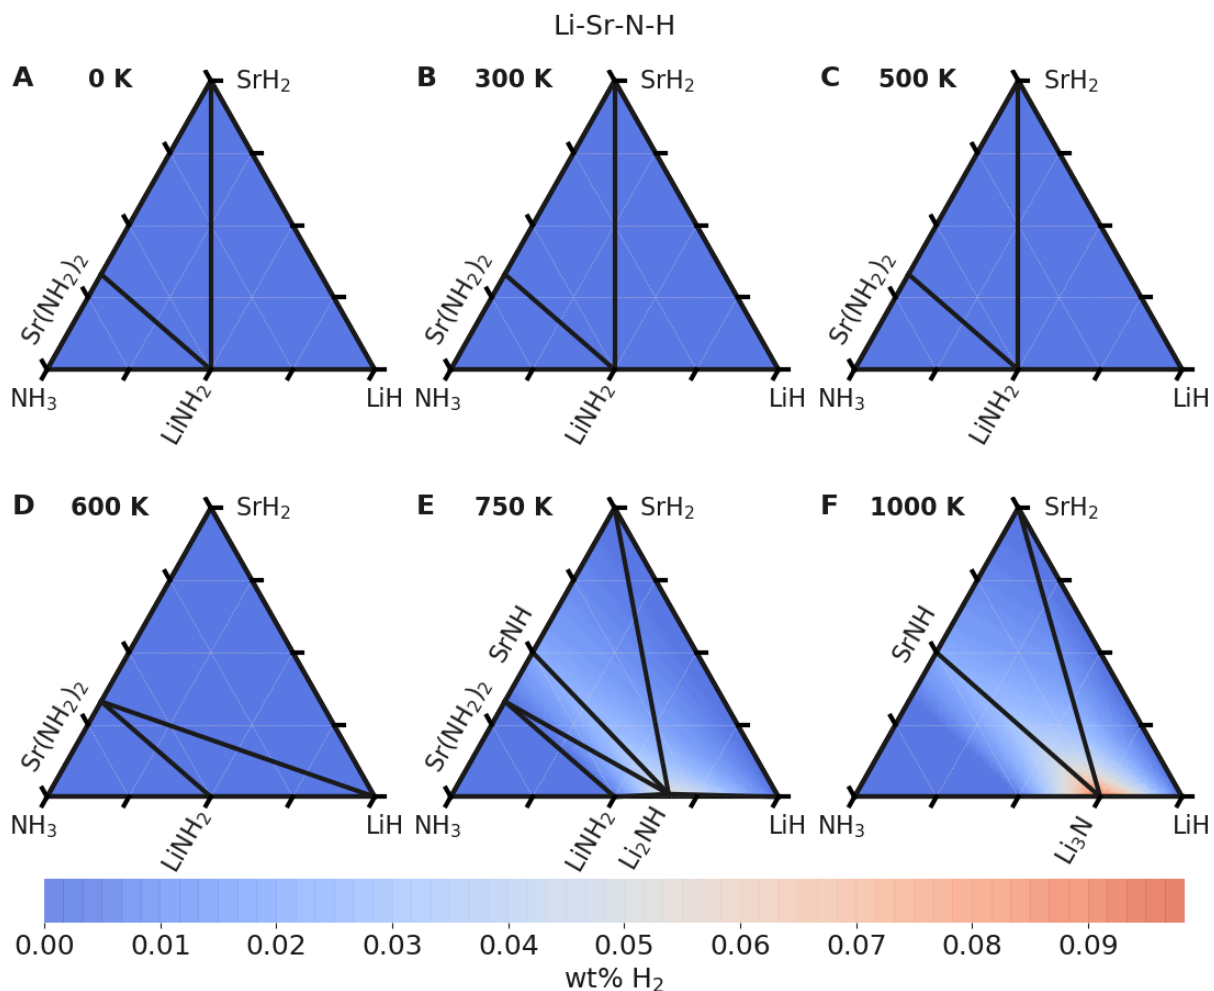

**Figure S13.** Composition phase diagrams of Li-Sr-N-H system at different temperatures at  $P_{\text{NH}_3} = 0.1 \text{ bar}$ . **A)** 0 K, **B)** 300 K, **C)** 500 K, **D)** 600 K, **E)** 750 K, **F)** 1000 K. The color axis is the weight fraction of released H<sub>2</sub> relative to the mixture at 0 K.

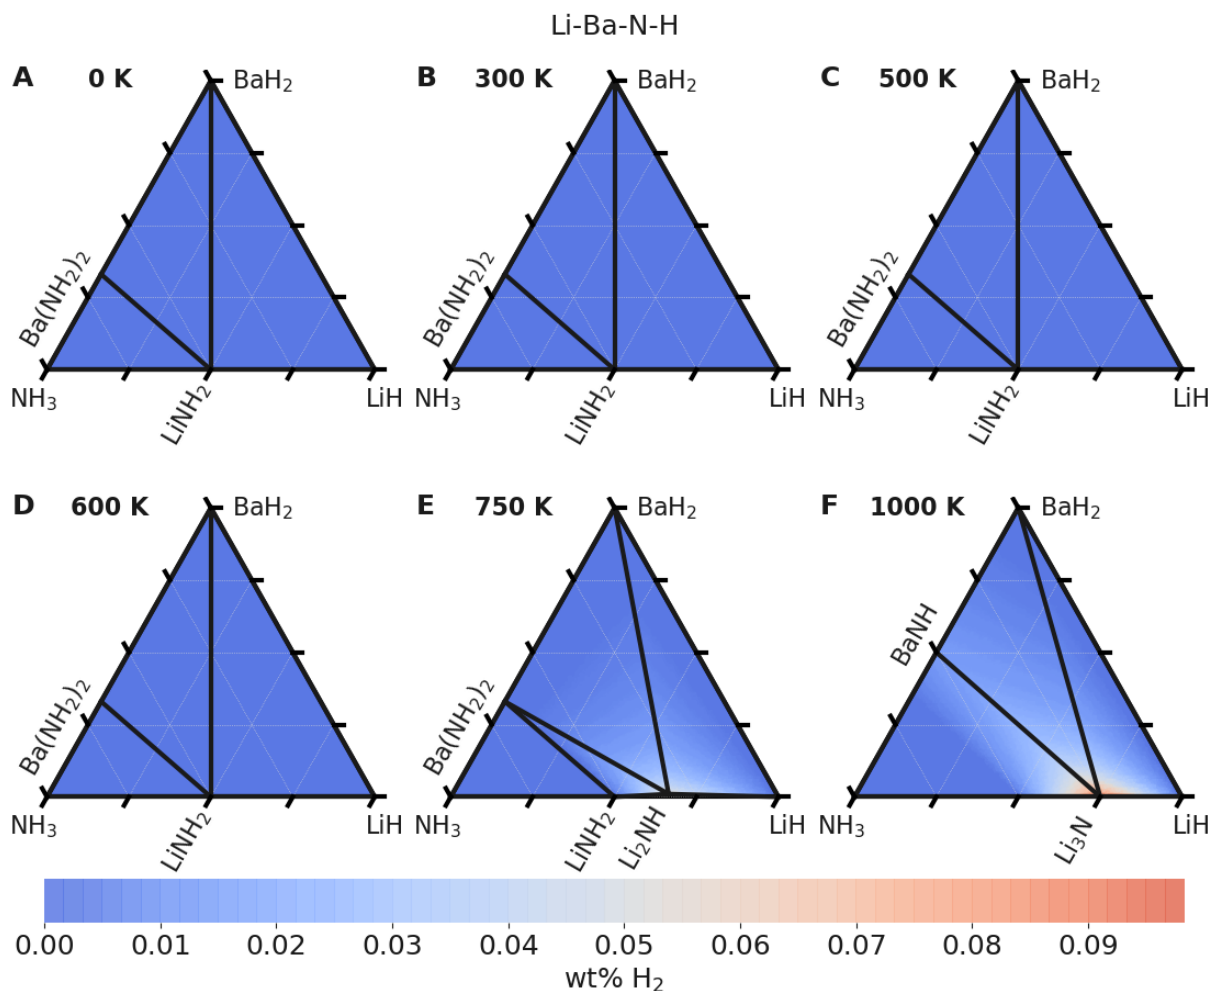

**Figure S14. Composition phase diagrams of Li-Ba-N-H system at different temperatures at  $P_{\text{NH}_3} = 0.1 \text{ bar}$ . A) 0 K, B) 300 K, C) 500 K, D) 600 K, E) 750 K, F) 1000 K. The color axis is the weight fraction of released H<sub>2</sub> relative to the mixture at 0 K.**

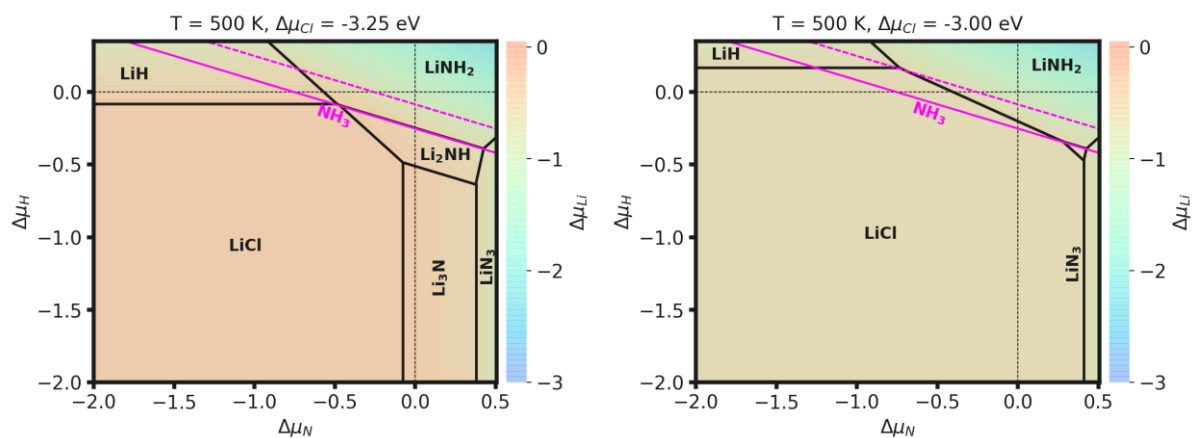

**Figure S15. Li-Cl-N-H quaternary chemical potential phase diagram.** At  $T = 500$  K. The regions labeled by compositions are regions of stability for compounds with those compositions. The sets of  $\Delta\mu_i$  that fall above the magenta lines correspond to conditions where  $\text{NH}_3$  is predicted to be stable for  $P_{\text{NH}_3} = 10^{-6}$  bar (solid) and  $P_{\text{NH}_3} = 0.1$  bar (dashed).

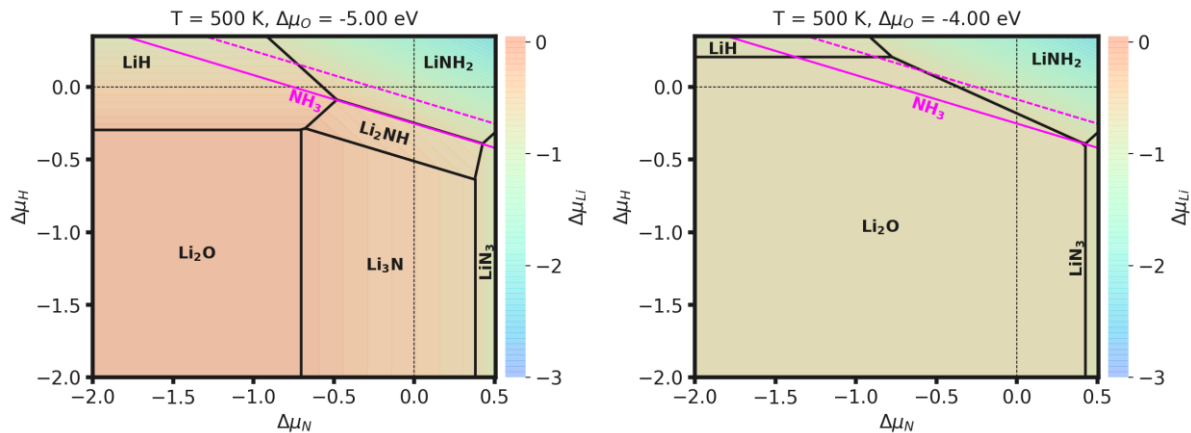

**Figure S16. Li-O-N-H quaternary chemical potential phase diagram.** At  $T = 500$  K. The regions labeled by compositions are regions of stability for compounds with those compositions. The sets of  $\Delta\mu_i$  that fall above the magenta lines correspond to conditions where  $\text{NH}_3$  is predicted to be stable for  $P_{\text{NH}_3} = 10^{-6}$  bar (solid) and  $P_{\text{NH}_3} = 0.1$  bar (dashed).

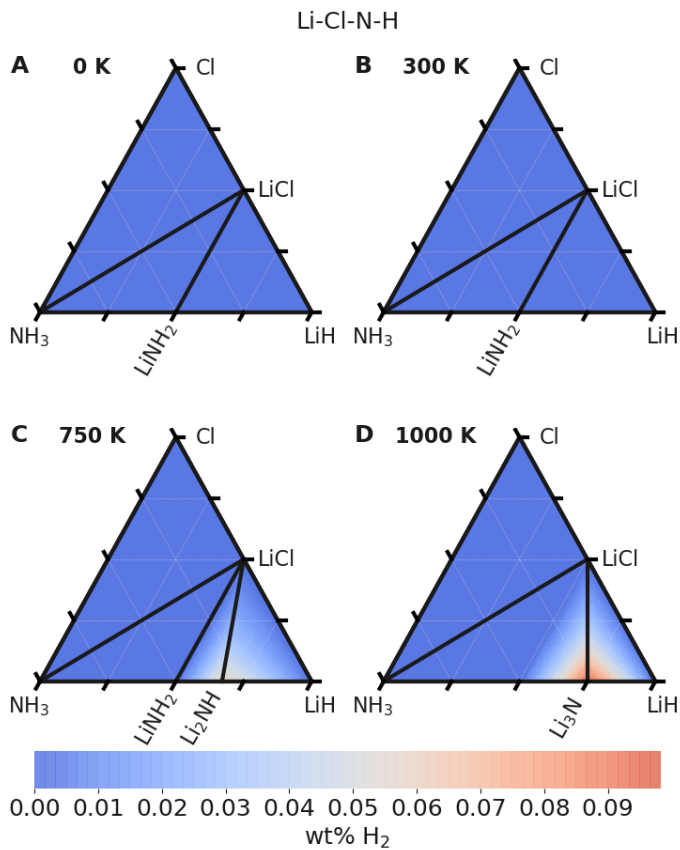

**Figure S17. Composition phase diagrams of Li-Cl-N-H system at different temperatures at  $P_{\text{NH}_3} = 0.1 \text{ bar}$ . A) 0 K, B) 300 K, C) 750 K, D) 1000 K. The color axis is the weight fraction of released  $\text{H}_2$  relative to the mixture at 0 K.**

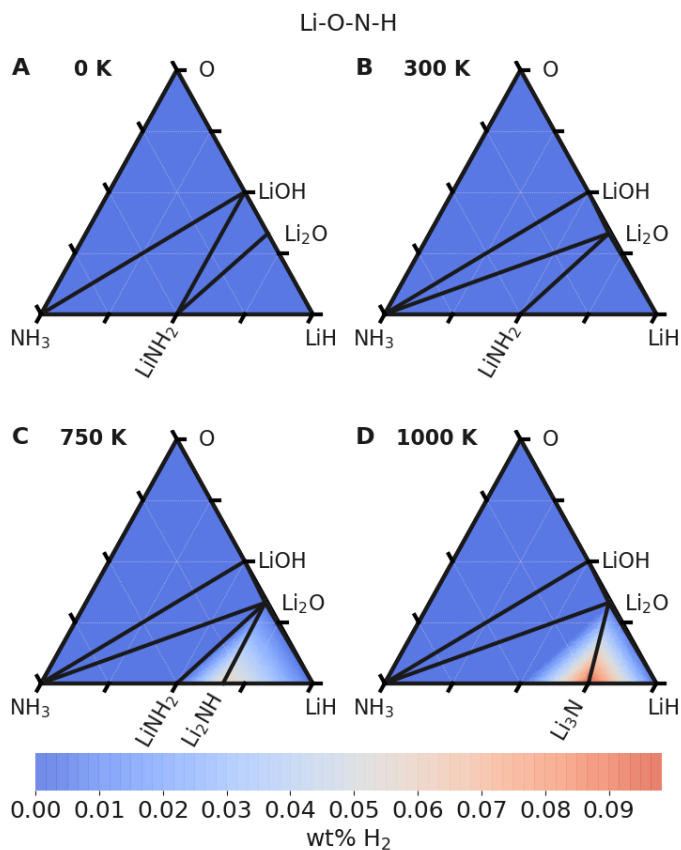

**Figure S18. Composition phase diagrams of Li-O-N-H system at different temperatures at  $P_{\text{NH}_3} = 0.1 \text{ bar}$ . A) 0 K, B) 300 K, C) 750 K, D) 1000 K. The color axis is the weight fraction of released  $\text{H}_2$  relative to the mixture at 0 K.**

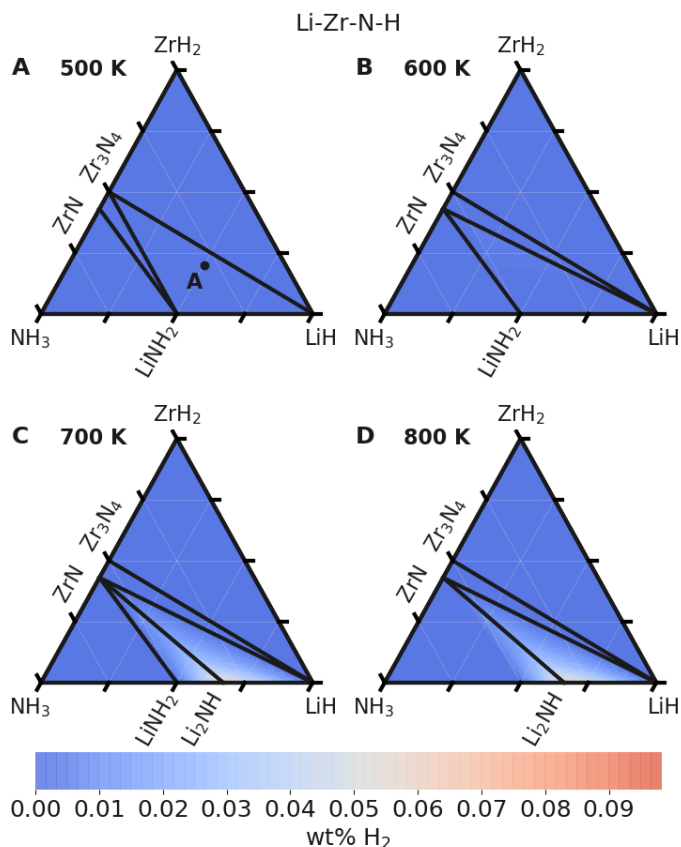

**Figure S19.** Composition phase diagrams of Li-Zr-N-H system at different temperatures at  $P_{\text{NH}_3} = 0.1 \text{ bar}$ . A) 500 K, B) 600 K, C) 700 K, D) 800 K. The color axis is the weight fraction of released  $\text{H}_2$  relative to the mixture at 0 K.

**Table S1.** PAW pseudopotentials used for all elements.

| Element | PAW pseudopotential used |
|---------|--------------------------|
| Li      | Li                       |
| Na      | Na_pv                    |
| K       | K_sv                     |
| Mg      | Mg                       |
| Ca      | Ca_sv                    |
| Sr      | Sr_sv                    |
| Ba      | Ba_sv                    |
| N       | N                        |
| O       | O                        |
| H       | H                        |
| Cl      | Cl                       |
| Zr      | Zr_sv                    |

**Derivation of Eq. 4 in Methods section for chemical potential phase diagrams**

For any closed  $N$ -element compositional space at equilibrium, the system's free energy is constant and so the definition of the chemical potential can be used to write the molar Gibbs free energy of any formed compound  $G_{A_{\alpha_1}B_{\alpha_2}\dots}$ :

$$G_{A_{\alpha_1}B_{\alpha_2}\dots} = \sum_i \alpha_i \mu_i \quad (\text{S1})$$

where  $\alpha_i$  is the stoichiometric coefficient of each element  $i$  in the compound. Because  $\mu_i$  is the elemental reference state chemical potential ( $\mu_i^0(0 \text{ K}, 0 \text{ bar})$ ) plus the deviation from that state ( $\Delta\mu_i$ ),  $G_{A_{\alpha_1}B_{\alpha_2}\dots}$  of any compound at equilibrium, can be written as:

$$G_{A_{\alpha_1}B_{\alpha_2}\dots} = \sum_i \alpha_i (\mu_i^0 + \Delta\mu_i) \quad (\text{S2})$$

where  $\alpha_i$  is the stoichiometric coefficient of each element  $i$  in the compound, and each elemental chemical potential  $\mu_i$  is rewritten as the sum of its elemental reference state chemical potential ( $\mu_i^0(0 \text{ K}, 0 \text{ bar})$ ) plus the deviation from that state ( $\Delta\mu_i$ ). Changes in  $\Delta\mu_i$  caused by each of these system variables can be considered independently. As a result, we decompose each  $\Delta\mu_i$  into a temperature dependent component,  $\Delta\mu_i(T)$ , and a component containing all other contributions to  $\Delta\mu_i$ ,  $\Delta\mu_i(\forall C \neq T)$ , where  $C$  is any other means of changing  $\mu_i$  of an element from its reference state  $\mu_i^0$ . Eq. S2 can be expanded into Eq. 1 using the term definitions described in the Methods.

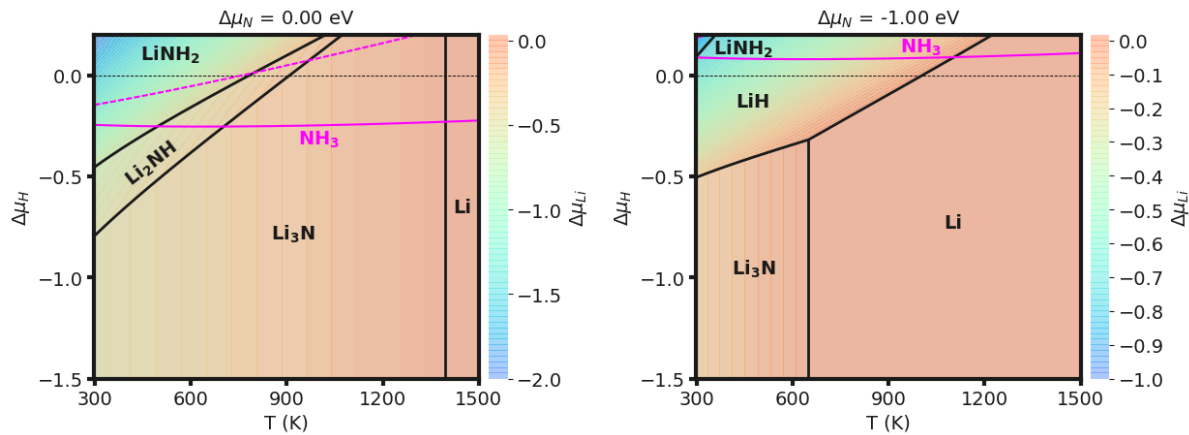

**Figure S20. Li-N-H ternary  $T$ - $\Delta\mu_H$  phase diagram.** The regions labeled by compositions are regions of stability for compounds with those compositions. The sets of  $(T, \Delta\mu_i)$  that fall above the magenta lines correspond to conditions where  $\text{NH}_3$  is predicted to be stable for  $P_{\text{NH}_3} = 10^{-6} \text{ bar}$  (solid) and  $P_{\text{NH}_3} = 0.1 \text{ bar}$  (dashed).

**Table S2. Zero point energies for gas phase species.**

| Molecule        | ZPE<br>(eV/molecule) |
|-----------------|----------------------|
| H <sub>2</sub>  | 0.27                 |
| N <sub>2</sub>  | 0.15                 |
| NH <sub>3</sub> | 1.79                 |
| O <sub>2</sub>  | 0.10                 |
| Cl <sub>2</sub> | 0.03                 |

**Table S3. DFT volumes and  $\Delta H_f(0\text{ K})$  for all compounds considered.** The MPID is the Materials Project ID number for the compound used as the starting structure for either direct relaxation or structure templating followed by a relaxation.

| Index | Formula  | MPID       | Volume<br>(Å <sup>3</sup> /atom) | $\Delta H_f(0\text{ K})$<br>(eV/atom) |
|-------|----------|------------|----------------------------------|---------------------------------------|
| 1     | Ba16H1N8 | mp-675153  | 31.76                            | -0.509                                |
| 2     | Ba1H1N1  | mp-34932   | 17.53                            | -0.721                                |
| 3     | Ba1H1N1  | mp-1187172 | 17.60                            | -0.715                                |
| 4     | Ba1H2    | mp-23715   | 18.59                            | -0.605                                |
| 5     | Ba1H2    | mp-1182102 | 18.60                            | -0.605                                |
| 6     | Ba1H2    | mp-1179094 | 18.60                            | -0.605                                |
| 7     | Ba1H2    | mp-568441  | 18.85                            | -0.582                                |
| 8     | Ba1H2    | mp-24809   | 17.26                            | -0.579                                |
| 9     | Ba1H2    | mp-23759   | 17.22                            | -0.579                                |
| 10    | Ba1H2    | mp-23711   | 21.30                            | -0.561                                |
| 11    | Ba1H4N2  | mp-643905  | 14.14                            | -0.602                                |
| 12    | Ba1H4N2  | mp-696969  | 14.32                            | -0.601                                |
| 13    | Ba1H4N2  | mp-24383   | 15.46                            | -0.544                                |
| 14    | Ba1N1    | mp-29973   | 25.20                            | -0.581                                |
| 15    | Ba1N2    | mp-1001    | 18.66                            | -0.650                                |
| 16    | Ba1N2    | mp-1009657 | 18.67                            | -0.622                                |
| 17    | Ba1N6    | mp-1707    | 16.23                            | -0.261                                |
| 18    | Ba1N6    | mp-2131    | 17.11                            | -0.255                                |
| 19    | Ba2H1N1  | mp-690794  | 24.22                            | -0.629                                |
| 20    | Ba2H1N1  | mp-24119   | 23.98                            | -0.622                                |
| 21    | Ba2N1    | mp-1892    | 35.50                            | -0.548                                |
| 22    | Ba3N1    | mp-10736   | 45.76                            | -0.401                                |
| 23    | Ba3N2    | mp-1559    | 27.78                            | -0.485                                |
| 24    | Ba3N2    | mp-568293  | 25.61                            | -0.485                                |
| 25    | Ba3N2    | mp-568172  | 27.52                            | -0.477                                |
| 26    | Ba3N2    | mp-1047    | 26.84                            | -0.463                                |
| 27    | Ba3N2    | mp-13146   | 26.12                            | -0.445                                |
| 28    | Ba8H3N4  | mp-530696  | 25.85                            | -0.592                                |
| 29    | Ca16H1N8 | mp-675153  | 21.78                            | -0.878                                |
| 30    | Ca1H1N1  | mp-1187172 | 11.29                            | -0.943                                |
| 31    | Ca1H1N1  | mp-34932   | 11.72                            | -0.898                                |
| 32    | Ca1H2    | mp-1179094 | 11.82                            | -0.663                                |
| 33    | Ca1H2    | mp-1102038 | 13.27                            | -0.637                                |
| 34    | Ca1H2    | mp-568441  | 12.58                            | -0.627                                |

|    |           |            |       |        |
|----|-----------|------------|-------|--------|
| 35 | Ca1H2     | mp-23759   | 11.11 | -0.603 |
| 36 | Ca1H2     | mp-23710   | 15.74 | -0.537 |
| 37 | Ca1H4N2   | mp-643905  | 9.56  | -0.700 |
| 38 | Ca1H4N2   | mp-696969  | 9.69  | -0.697 |
| 39 | Ca1H4N2   | mp-24383   | 12.17 | -0.628 |
| 40 | Ca1N1     | mp-29973   | 17.51 | -0.853 |
| 41 | Ca1N2     | mp-1001    | 12.85 | -0.653 |
| 42 | Ca1N2     | mp-1009657 | 12.68 | -0.645 |
| 43 | Ca1N6     | mp-2131    | 13.06 | -0.242 |
| 44 | Ca1N6     | mp-1707    | 12.71 | -0.214 |
| 45 | Ca2H1N1   | mp-690794  | 15.94 | -0.946 |
| 46 | Ca2H1N1   | mp-24119   | 15.93 | -0.942 |
| 47 | Ca2N1     | mp-1892    | 23.91 | -0.886 |
| 48 | Ca3N1     | mp-10736   | 29.24 | -0.632 |
| 49 | Ca3N2     | mp-986716  | 18.56 | -0.959 |
| 50 | Ca3N2     | mp-844     | 18.56 | -0.959 |
| 51 | Ca3N2     | mp-1047    | 18.14 | -0.942 |
| 52 | Ca3N2     | mp-568293  | 17.45 | -0.927 |
| 53 | Ca3N2     | mp-568172  | 17.16 | -0.920 |
| 54 | Ca3N2     | mp-13146   | 17.17 | -0.870 |
| 55 | Ca8H3N4   | mp-530696  | 17.21 | -0.918 |
| 56 | K15H9N8   | mp-1201065 | 19.36 | -0.169 |
| 57 | K1H1      | mp-24721   | 22.29 | -0.296 |
| 58 | K1H1      | mp-24084   | 22.30 | -0.296 |
| 59 | K1H1      | mp-23870   | 22.32 | -0.296 |
| 60 | K1H2N1    | mp-697144  | 12.90 | -0.445 |
| 61 | K1H2N1    | mp-1105785 | 12.06 | -0.433 |
| 62 | K1H2N1    | mp-1079418 | 12.17 | -0.433 |
| 63 | K1H2N1    | mp-1106045 | 12.24 | -0.429 |
| 64 | K1H2N1    | mp-23850   | 14.41 | -0.423 |
| 65 | K1H2N1    | mp-1087524 | 12.49 | -0.422 |
| 66 | K1H2N1    | mp-1189646 | 12.76 | -0.415 |
| 67 | K1H2N1    | mp-23702   | 17.30 | -0.386 |
| 68 | K1N3      | mp-743     | 15.99 | -0.232 |
| 69 | K1N3      | mp-1066400 | 19.97 | -0.206 |
| 70 | K1N3      | mp-581833  | 16.81 | -0.205 |
| 71 | K1N3      | mp-570538  | 19.09 | -0.200 |
| 72 | K2H1N1    | mp-1223097 | 19.55 | -0.126 |
| 73 | K2H1N1    | mp-34465   | 20.02 | -0.120 |
| 74 | K3H3N2    | mp-977164  | 18.00 | -0.269 |
| 75 | K3N1      | mp-2251    | 32.60 | 0.422  |
| 76 | K3N1      | mp-2341    | 24.96 | 0.517  |
| 77 | K4H1N1    | mp-30228   | 25.80 | 0.194  |
| 78 | K7H5N4    | mp-1200910 | 19.34 | -0.207 |
| 79 | Li15H9N8  | mp-1201065 | 7.84  | -0.596 |
| 80 | Li1Cl1    | mp-22905   | 16.52 | -2.069 |
| 81 | Li1Cl1    | mp-1185319 | 20.21 | -2.062 |
| 82 | Li1H1     | mp-23870   | 7.99  | -0.467 |
| 83 | Li1H1     | mp-1009220 | 7.79  | -0.229 |
| 84 | Li1H1N1   | mp-1210462 | 10.09 | -0.263 |
| 85 | Li1H1N1O2 | mp-696315  | 8.10  | -0.958 |
| 86 | Li1H1O1   | mp-625998  | 8.61  | -1.674 |
| 87 | Li1H2N1   | mp-23702   | 7.70  | -0.585 |

|     |            |            |       |        |
|-----|------------|------------|-------|--------|
| 88  | Li1H2N1    | mp-23850   | 7.72  | -0.583 |
| 89  | Li1H2N1    | mp-1079418 | 7.36  | -0.567 |
| 90  | Li1H2N1    | mp-1188477 | 7.35  | -0.559 |
| 91  | Li1H2N1    | mp-1106045 | 7.47  | -0.548 |
| 92  | Li1H2N1    | mp-1189646 | 7.26  | -0.510 |
| 93  | Li1H2N1    | mp-24428   | 7.23  | -0.492 |
| 94  | Li1H2N1    | mp-1087524 | 8.00  | -0.480 |
| 95  | Li1H2N1    | mp-1188218 | 7.23  | -0.392 |
| 96  | Li1H2N1    | mp-1188409 | 6.13  | -0.358 |
| 97  | Li1H2N1O3  | mp-722902  | 9.91  | -1.044 |
| 98  | Li1H3      | mp-1184938 | 4.87  | 0.582  |
| 99  | Li1H3O2    | mp-625211  | 7.31  | -1.400 |
| 100 | Li1H6N1O6  | mp-23906   | 8.64  | -1.064 |
| 101 | Li1Mg1H6N3 | mp-720856  | 7.51  | -0.550 |
| 102 | Li1Mg1H6N3 | mp-696329  | 7.74  | -0.538 |
| 103 | Li1Mg1N1   | mp-37906   | 10.08 | -0.817 |
| 104 | Li1Mg1N1   | mp-30156   | 10.23 | -0.816 |
| 105 | Li1N1      | mp-1179882 | 9.11  | -0.233 |
| 106 | Li1N1      | mp-1180489 | 9.25  | -0.148 |
| 107 | Li1N1      | mp-1064647 | 7.25  | -0.070 |
| 108 | Li1N1      | mp-1059612 | 7.76  | 0.813  |
| 109 | Li1N1      | mp-1064119 | 8.23  | 0.964  |
| 110 | Li1N1      | mp-1058689 | 8.49  | 1.135  |
| 111 | Li1N1O3    | mp-8180    | 9.27  | -1.044 |
| 112 | Li1N2      | mp-1206884 | 9.62  | -0.242 |
| 113 | Li1N2      | mp-1071868 | 8.42  | 0.053  |
| 114 | Li1N3      | mp-570538  | 10.47 | -0.203 |
| 115 | Li1N3      | mp-1066400 | 10.74 | -0.198 |
| 116 | Li1N3      | mp-827     | 10.34 | -0.098 |
| 117 | Li1N3      | mp-22777   | 11.48 | 0.966  |
| 118 | Li1N3      | mp-1064272 | 12.08 | 0.990  |
| 119 | Li1N3      | mp-634410  | 10.62 | 1.040  |
| 120 | Li1N3      | mp-636056  | 13.38 | 1.074  |
| 121 | Li1N3      | mp-1065265 | 7.91  | 1.479  |
| 122 | Li1N3      | mp-1064161 | 7.19  | 2.371  |
| 123 | Li1O2      | mp-1018789 | 8.94  | -1.035 |
| 124 | Li2H1N1    | mp-1189725 | 8.22  | -0.602 |
| 125 | Li2H1N1    | mp-699284  | 7.69  | -0.596 |
| 126 | Li2H1N1    | mp-1190219 | 7.68  | -0.575 |
| 127 | Li2H1N1    | mp-34465   | 7.83  | -0.539 |
| 128 | Li2Mg1H2N2 | mp-1193106 | 8.90  | -0.719 |
| 129 | Li2Mg1H8N4 | mp-759183  | 8.44  | -0.559 |
| 130 | Li2N1      | mp-1062345 | 9.30  | -0.176 |
| 131 | Li2O1      | mp-1960    | 7.96  | -2.026 |
| 132 | Li2O1      | mp-755894  | 7.54  | -1.938 |
| 133 | Li2O2      | mp-841     | 7.93  | -1.601 |
| 134 | Li3H2N2    | mp-1210795 | 8.34  | -0.358 |
| 135 | Li3H3N2    | mp-977164  | 7.99  | -0.571 |
| 136 | Li3N1      | mp-999496  | 10.88 | -0.462 |
| 137 | Li3N1      | mp-1190632 | 8.42  | -0.456 |
| 138 | Li3N1      | mp-1189035 | 8.41  | -0.456 |
| 139 | Li3N1      | mp-2639    | 14.42 | -0.449 |
| 140 | Li3N1      | mp-999495  | 7.62  | -0.320 |

|     |             |            |        |        |
|-----|-------------|------------|--------|--------|
| 141 | Li3N1       | mp-11801   | 15.87  | -0.135 |
| 142 | Li3N2       | mp-1222421 | 11.20  | 0.302  |
| 143 | Li4H1N1     | mp-30228   | 9.56   | -0.466 |
| 144 | Li7H5N4     | mp-1200910 | 7.92   | -0.592 |
| 145 | Mg16H1N8    | mp-675153  | 14.17  | -0.668 |
| 146 | Mg1H1N1     | mp-1187172 | 8.34   | -0.718 |
| 147 | Mg1H1N1     | mp-34932   | 8.29   | -0.601 |
| 148 | Mg1H2       | mp-23710   | 9.91   | -0.269 |
| 149 | Mg1H2       | mp-23711   | 9.72   | -0.267 |
| 150 | Mg1H2       | mp-1102038 | 9.01   | -0.232 |
| 151 | Mg1H2       | mp-23714   | 8.00   | -0.176 |
| 152 | Mg1H2       | mp-23713   | 8.00   | -0.176 |
| 153 | Mg1H2       | mp-1182102 | 8.00   | -0.176 |
| 154 | Mg1H2       | mp-1181926 | 8.01   | -0.176 |
| 155 | Mg1H4N2     | mp-24383   | 9.03   | -0.619 |
| 156 | Mg1H4N2     | mp-643905  | 7.05   | -0.564 |
| 157 | Mg1H4N2     | mp-696969  | 7.16   | -0.561 |
| 158 | Mg1Li3H8N4  | mp-505381  | 9.02   | -0.501 |
| 159 | Mg1Li4H10N5 | mp-1221143 | 8.80   | -0.518 |
| 160 | Mg1Li7H16N8 | mp-707956  | 8.49   | -0.449 |
| 161 | Mg1N1       | mp-29973   | 13.30  | -0.570 |
| 162 | Mg1N2       | mp-1001    | 10.39  | -0.225 |
| 163 | Mg1N6       | mp-676     | 10.86  | 0.059  |
| 164 | Mg1N6       | mp-1707    | 11.02  | 0.073  |
| 165 | Mg2H1N1     | mp-690794  | 10.92  | -0.673 |
| 166 | Mg2H1N1     | mp-24119   | 10.98  | -0.664 |
| 167 | Mg2Li1H2N1  | mp-1192182 | 10.25  | -0.537 |
| 168 | Mg2Li1H6N3  | mp-604147  | 11.36  | -0.378 |
| 169 | Mg2N1       | mp-1245    | 15.19  | -0.656 |
| 170 | Mg3N1       | mp-10736   | 17.60  | -0.327 |
| 171 | Mg3N2       | mp-1559    | 12.11  | -0.976 |
| 172 | Mg3N2       | mp-1047    | 11.83  | -0.919 |
| 173 | Mg3N2       | mp-568293  | 11.49  | -0.893 |
| 174 | Mg3N2       | mp-568172  | 11.38  | -0.883 |
| 175 | Mg3N2       | mp-13146   | 11.30  | -0.841 |
| 176 | Mg8H3N4     | mp-530696  | 11.75  | -0.643 |
| 177 | N1H3        | mp-0       | 330.00 | -0.266 |
| 178 | Na15H9N8    | mp-1201065 | 12.65  | -0.270 |
| 179 | Na1H1       | mp-24721   | 13.41  | -0.297 |
| 180 | Na1H1       | mp-23870   | 13.40  | -0.297 |
| 181 | Na1H2N1     | mp-23850   | 11.13  | -0.442 |
| 182 | Na1H2N1     | mp-1079418 | 9.31   | -0.439 |
| 183 | Na1H2N1     | mp-23702   | 11.71  | -0.437 |
| 184 | Na1H2N1     | mp-24428   | 9.16   | -0.434 |
| 185 | Na1H2N1     | mp-1188477 | 9.28   | -0.433 |
| 186 | Na1H2N1     | mp-1106045 | 8.78   | -0.421 |
| 187 | Na1H2N1     | mp-1087524 | 8.61   | -0.417 |
| 188 | Na1H2N1     | mp-1189646 | 9.24   | -0.395 |
| 189 | Na1N3       | mp-570538  | 13.70  | -0.174 |
| 190 | Na1N3       | mp-1066400 | 13.95  | -0.172 |
| 191 | Na1N3       | mp-827     | 12.11  | -0.152 |
| 192 | Na1N3       | mp-581833  | 12.93  | -0.106 |
| 193 | Na2H1N1     | mp-699284  | 12.69  | -0.241 |

|     |          |            |       |        |
|-----|----------|------------|-------|--------|
| 194 | Na2H1N1  | mp-34465   | 13.06 | -0.217 |
| 195 | Na3H3N2  | mp-977164  | 12.06 | -0.338 |
| 196 | Na3N1    | mp-2251    | 19.70 | 0.172  |
| 197 | Na3N1    | mp-2341    | 15.62 | 0.214  |
| 198 | Na4H1N1  | mp-30228   | 16.96 | 0.031  |
| 199 | Na7H5N4  | mp-1200910 | 12.78 | -0.292 |
| 200 | Sr16H1N8 | mp-675153  | 26.86 | -0.671 |
| 201 | Sr1H1N1  | mp-1187172 | 13.82 | -0.839 |
| 202 | Sr1H1N1  | mp-34932   | 14.27 | -0.818 |
| 203 | Sr1H2    | mp-1182102 | 14.77 | -0.655 |
| 204 | Sr1H2    | mp-1179094 | 14.74 | -0.655 |
| 205 | Sr1H2    | mp-23711   | 16.66 | -0.626 |
| 206 | Sr1H2    | mp-568441  | 15.11 | -0.625 |
| 207 | Sr1H2    | mp-24809   | 13.84 | -0.610 |
| 208 | Sr1H2    | mp-1205322 | 13.82 | -0.610 |
| 209 | Sr1H4N2  | mp-643905  | 11.45 | -0.665 |
| 210 | Sr1H4N2  | mp-696969  | 11.60 | -0.663 |
| 211 | Sr1H4N2  | mp-24383   | 14.28 | -0.582 |
| 212 | Sr1N1    | mp-29973   | 21.33 | -0.686 |
| 213 | Sr1N2    | mp-1001    | 15.24 | -0.650 |
| 214 | Sr1N2    | mp-1009657 | 15.19 | -0.643 |
| 215 | Sr1N6    | mp-2131    | 14.77 | -0.270 |
| 216 | Sr1N6    | mp-1707    | 14.11 | -0.256 |
| 217 | Sr2H1N1  | mp-690794  | 19.73 | -0.772 |
| 218 | Sr2H1N1  | mp-24119   | 19.63 | -0.769 |
| 219 | Sr2N1    | mp-1892    | 29.61 | -0.682 |
| 220 | Sr3N1    | mp-10736   | 37.16 | -0.495 |
| 221 | Sr3N2    | mp-844     | 23.01 | -0.676 |
| 222 | Sr3N2    | mp-1047    | 22.54 | -0.660 |
| 223 | Sr3N2    | mp-568293  | 21.53 | -0.653 |
| 224 | Sr3N2    | mp-568172  | 21.28 | -0.640 |
| 225 | Sr3N2    | mp-13146   | 21.48 | -0.590 |
| 226 | Sr8H3N4  | mp-530696  | 21.23 | -0.739 |
